# Supplementary material for: Efficacy and Safety of Sesame Oil Cake Extract on Memory Function Improvement: A 12-Week, Randomized, Double-Blind, Placebo-Controlled Pilot Study
Source: MDPI journal article supplement (doi:10.3390/nu13082606), 2021-07-28
Supplement: s1 [file s1]

## Supplementary materials

### A. Amyloid $\beta$ (1-40)

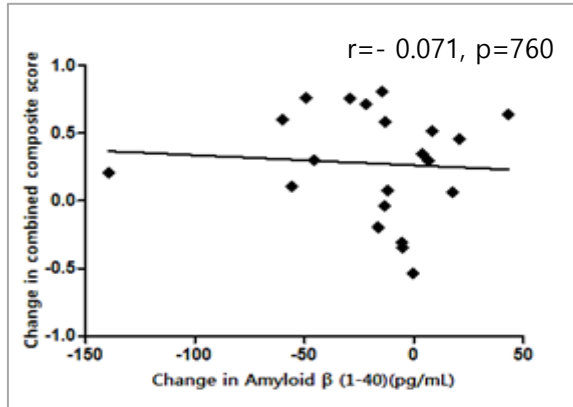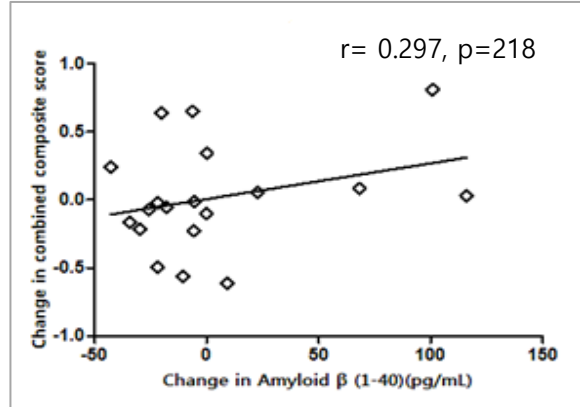

### B. Amyloid $\beta$ (1-42)

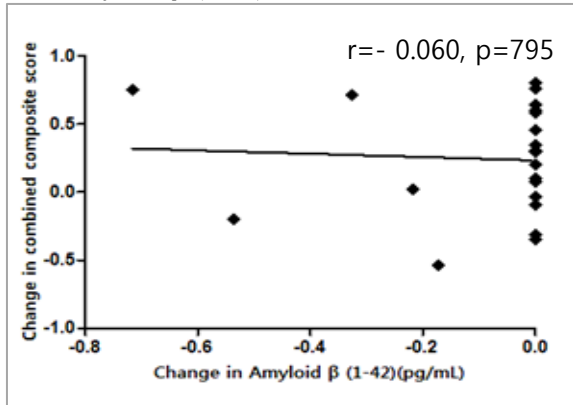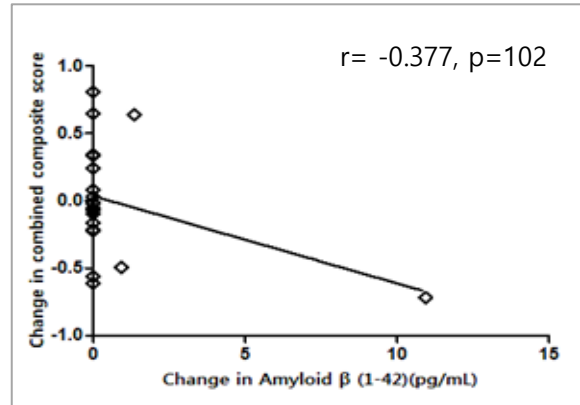

### C. Amyloid $\beta$ (42/40 ratio)

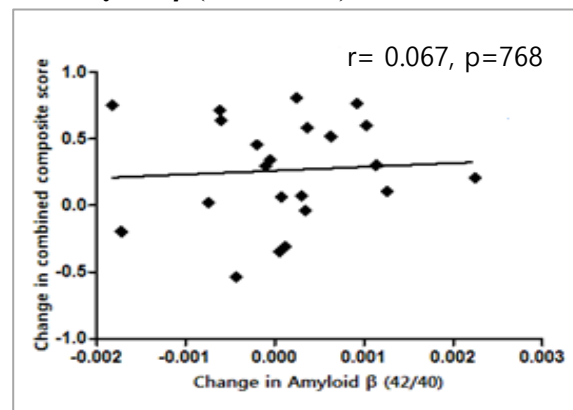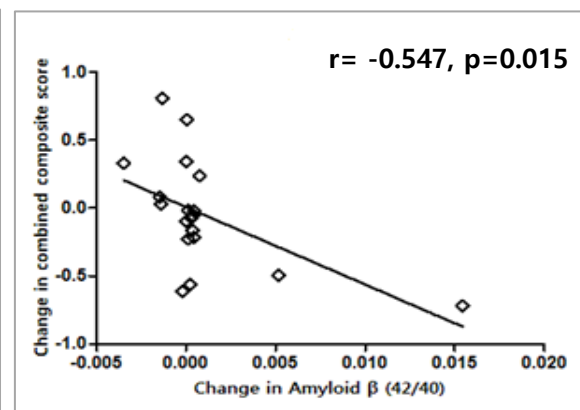

SOCE group

Placebo group

**Supplementary Figure S1.** Associations between Changes in plasma amyloid- $\beta$  levels and combined composite score

**Supplementary Table S1.** Major nutrient intakes and metabolic equivalent values of the SOCE and placebo groups measured at baseline and 12 weeks

|                      | SOCE group (n=35)   |                     |                   |                             | Placebo group (n=35) |                     |                   |                             |                             |
|----------------------|---------------------|---------------------|-------------------|-----------------------------|----------------------|---------------------|-------------------|-----------------------------|-----------------------------|
|                      | Baseline            | Week 12             | Change            | <i>P</i> value <sup>1</sup> | Baseline             | Week 12             | Change            | <i>P</i> value <sup>1</sup> | <i>P</i> value <sup>2</sup> |
| Energy (Kcal)        | 1,534.2±546.5       | 1,471.3±499.8       | 62.9±391.5        | 0.348                       | 1527.9±367.0         | 1,600.0±444.3       | 72.2±471.6        | 0.372                       | 0.197                       |
| Carbohydrates (g)    | 251.9±91.3          | 244.5±73.9          | -7.4±61.6         | 0.483                       | 261.2±71.5           | 269.4±86.3          | 8.2±88.6          | 0.586                       | 0.395                       |
| Lipids (g)           | 33.7±18.5           | 32.5±17.9           | -1.2±20.2         | 0.732                       | 31.6±14.8            | 34.0±12.3           | 2.4±17.2          | 0.426                       | 0.435                       |
| Protein (g)          | 61.8±28.8           | 55.8±22.7           | -6.0±26.9         | 0.196                       | 55.8±17.1            | 59.7±18.3           | 3.9±19.4          | 0.239                       | 0.081                       |
| Fiber (g)            | 22.8±10.4           | 21.5±9.9            | -1.3±9.8          | 0.437                       | 22.1±9.6             | 22.1±8.7            | 0.04±9.5          | 0.978                       | 0.562                       |
| Vitamin A (ug RE)    | 804.9±592.2         | 872.9±603.2         | 68.0±624.8        | 0.524                       | 914.2±682.5          | 901.5±618.2         | -12.7±739.2       | 0.919                       | 0.623                       |
| Vitamin D (ug)       | 3.8±5.3             | 4.6±6.4             | 0.9±8.6           | 0.554                       | 3.9±5.3              | 4.6±5.9             | 0.7±7.6           | 0.602                       | 0.925                       |
| Vitamin E (mg)       | 13.8±8.7            | 12.6±7.1            | -1.2±8.8          | 0.429                       | 13.3±6.0             | 13.7±7.6            | 0.3±7.8           | 0.800                       | 0.446                       |
| Vitamin C (mg)       | 119.5±81.1          | 107.1±92.6          | -12.4±74.7        | 0.333                       | 110.5±100.7          | 110.9±68.1          | 0.4±97.4          | 0.982                       | 0.540                       |
| MET value (min/week) | 2,312.6±<br>2,916.1 | 2,670.9±<br>2,926.8 | 358.3±<br>1,840.6 | 0.258                       | 2,605.7±<br>3,575.0  | 3,057.7±<br>2,915.8 | 452.0±<br>4,123.7 | 0.521                       | 0.903                       |

Values are presented as mean ± SD

<sup>1</sup> Analyzed by paired *t* test

<sup>2</sup> Change values between groups were analyzed by independent *t*-test

Abbreviation: MET, metabolic equivalent

**Supplementary Table S2.** Laboratory profiles of the subjects in this study

| Laboratory profiles<br>(standard range)   | SOCE group (n=35) |            |                      | Placebo group (n=35) |            |                      |                      |
|-------------------------------------------|-------------------|------------|----------------------|----------------------|------------|----------------------|----------------------|
|                                           | Baseline          | Week 12    | p-value <sup>1</sup> | Baseline             | Week 12    | p-value <sup>1</sup> | p value <sup>2</sup> |
| WBC<br>(4.8–10.8×10 <sup>3</sup> /μL)     | 5.8±1.2           | 5.6±1.4    | 0.360                | 5.8±1.8              | 5.5±1.1    | 0.215                | 0.681                |
| RBC<br>(4.2–5.4×100 <sup>3</sup> /μL)     | 4.4±0.4           | 4.4±0.5    | 0.243                | 4.5±0.4              | 4.4±0.4    | 0.035                | 0.526                |
| Hemoglobin<br>(12–16g/dL)                 | 13.6±1.2          | 13.4±1.3   | 0.145                | 13.8±1.3             | 13.6±1.3   | 0.014                | 0.520                |
| Hematocrit<br>(37–47%)                    | 40.6±3.3          | 40.1±3.7   | 0.118                | 41.0±3.6             | 40.1±3.5   | 0.006                | 0.399                |
| Platelet<br>(130–450×10 <sup>3</sup> /μL) | 233.6±60.6        | 233.1±66.7 | 0.879                | 220.5±40.5           | 226.0±39.6 | 0.280                | 0.327                |
| ALP<br>(45–129IU/L)                       | 71.3±23.5         | 69.5±24.6  | 0.252                | 65.6±15.9            | 64.2±16.6  | 0.200                | 0.787                |
| GGT<br>(8–48IU/L)                         | 25.4±16.3         | 25.4±16.9  | 0.972                | 18.4±8.2             | 19.8±9.8   | 0.155                | 0.499                |
| AST<br>(12–33IU/L)                        | 29.0±14.3         | 25.5±7.9   | 0.040                | 25.4±6.6             | 24.3±6.2   | 0.159                | 0.204                |
| ALT<br>(5–35IU/L)                         | 26.5±11.7         | 22.9±10.7  | 0.031                | 24.2±12.6            | 22.6±12.0  | 0.267                | 0.353                |
| Total bilirubin<br>(0.2–1.2mg/dL)         | 0.8±0.3           | 0.8±0.2    | 0.216                | 0.9±0.3              | 0.8±0.3    | 0.039                | 0.265                |
| Total protein<br>(6.7–8.3g/dL)            | 7.4±0.4           | 7.2±0.4    | 0.000                | 7.4±0.5              | 7.3±0.4    | 0.053                | 0.178                |
| Albumin<br>(3.5–5.3g/dL)                  | 4.4±0.2           | 4.4±0.3    | 0.014                | 4.4±0.2              | 4.3±0.2    | 0.047                | 0.600                |
| BUN<br>(8–23mg/dL)                        | 15.8±4.2          | 16.5±4.2   | 0.347                | 17.3±4.2             | 17.6±4.1   | 0.534                | 0.705                |
| Creatinine<br>(0.7–1.7mg/dL)              | 0.7±0.2           | 0.7±0.2    | 0.019                | 0.8±0.2              | 0.8±0.2    | 0.880                | 0.156                |
| Glucose<br>(74–106mg/dL)                  | 92.3±13.7         | 93.1±15.2  | 0.556                | 92.4±13.0            | 91.2±12.8  | 0.549                | 0.402                |
| CK<br>(50–200 IU/L)                       | 112.9±110.9       | 94.8±37.5  | 0.312                | 119.3±77.1           | 98.2±50.2  | 0.039                | 0.882                |
| LDH<br>(218–472 IU/L)                     | 365.8±46.8        | 372.5±51.9 | 0.880                | 375.0±62.5           | 359.3±51.6 | 0.010                | 0.012                |
| pH<br>(4.5–9.0)                           | 6.2±0.8           | 6.0±0.7    | 0.162                | 6.4±0.8              | 6.3±0.7    | 0.328                | 0.889                |

Values are presented as mean ± SD

<sup>1</sup> Differences between baseline and 12 weeks within each group were analyzed by paired t-test

<sup>2</sup> Change values between groups were analyzed by independent t-test

Abbreviations: WBC, White Blood Cell; RBC, Red Blood Cell; ALP, Alkaline Phosphatase; GGT, Gamma Glutamyl Transferase; AST, Aspartate Transaminase; ALT, Alanine Transaminase; BUN, Blood Urea Nitrogen; CK, creatine kinase; LDH, lactate dehydrogenase.
